# Supplementary material for: Engagement Promotes Abstinence in a Web-based Cessation Intervention: Cohort Study
Source: J Med Internet Res. 2013 Jan 28;15(1):e14. doi: 10.2196/jmir.2277 (PMC3636070; doi:10.2196/jmir.2277)
Supplement: Supplementary file 1 [file jmir_v15i1e14_app1.pdf]

## APPENDIX TABLES

**Table 1.** Smoking behavior in survey responders over the course of the study using weighted data

|                                | <b>Baseline</b> | <b>30-day follow-up</b> | <b>90-day follow-up</b> | <b>180-day follow-up</b> |
|--------------------------------|-----------------|-------------------------|-------------------------|--------------------------|
|                                | <b>% (N)</b>    | <b>% (N)</b>            | <b>% (N)</b>            | <b>% (N)</b>             |
| <b>Quit attempts</b>           |                 |                         |                         |                          |
| Yes                            | 72.9%           | 75.6%                   | 80.2%                   | 78.9%                    |
| No                             | 27.1%           | 24.4%                   | 19.8%                   | 21.1%                    |
| <b>Number of quit attempts</b> |                 |                         |                         |                          |
| Mean (SE)                      | 2.92 (0.22)     | 2.06 (0.22)             | 3.09 (0.28)             | 2.97 (0.34)              |
| <b>7-day abstinence</b>        | n/a             | 10.4%                   | 14.8%                   | 21.8%                    |
| <b>30-day abstinence</b>       | n/a             | 3.0%                    | 13.0%                   | 17.7%                    |
| <b>ITT 7-day abstinence*</b>   | n/a             | 6.7%                    | 8.4%                    | 10.4%                    |
| <b>ITT 30-day abstinence</b>   | n/a             | 2.0%                    | 7.4%                    | 8.5%                     |

\*The weighting is an additional adjustment to the Intent-to-treat adjustment, which treats all non-responders as current smokers, so may not be a valid rate.

**Table 2. Association between website usage and quit behavior over time using GEE in weighted data**

|                               | Quit Attempts       |                | 7-Day Abstinence    |                  | 30-Day Abstinence   |                |
|-------------------------------|---------------------|----------------|---------------------|------------------|---------------------|----------------|
|                               | <i>aOR [95% CI]</i> | <i>p-value</i> | <i>aOR [95% CI]</i> | <i>p-value**</i> | <i>aOR [95% CI]</i> | <i>p-value</i> |
| <b>Model 1<sup>1</sup></b>    |                     |                |                     |                  |                     |                |
| <b>Visits to the website*</b> | 1.11 (0.88, 1.40)   | 0.38           | 1.98 (1.56, 2.50)   | 0.00             | 1.76 (1.43, 2.16)   | 0.00           |
|                               |                     |                |                     |                  |                     |                |
| <b>Model 2<sup>1</sup></b>    |                     |                |                     |                  |                     |                |
| <b>Visits to the website*</b> | 1.22 (0.81, 1.84)   | 0.34           | 1.75 (1.35, 2.28)   | 0.00             | 1.54 (1.17, 2.02)   | 0.00           |
| <b>Use of web features</b>    |                     |                |                     |                  |                     |                |
| EX Community                  |                     |                |                     |                  |                     |                |
| 1 vs. 0 times                 | 0.51 (0.28, 0.94)   | 0.03           | 2.03 (0.96, 4.29)   | 0.06             | 1.66 (0.81, 3.42)   | 0.17           |
| 2+ vs. 0 times                | 0.67 (0.24, 1.85)   | 0.44           | 1.52 (0.68, 3.44)   | 0.31             | 2.07 (0.88, 4.88)   | 0.10           |
| Cigarette Tracker             |                     |                |                     |                  |                     |                |
| 1 vs. 0 times                 | 0.63 (0.31, 1.27)   | 0.19           | 1.16 (0.52, 2.61)   | 0.72             | 1.02 (0.48, 2.16)   | 0.96           |
| 2+ vs. 0 times                | 0.49 (0.20, 1.22)   | 0.12           | 0.95 (0.37, 2.44)   | 0.91             | 1.17 (0.41, 3.33)   | 0.77           |
| Beat Triggers Exercise        |                     |                |                     |                  |                     |                |

|                     |                   |      |                   |      |                   |      |
|---------------------|-------------------|------|-------------------|------|-------------------|------|
| 1 vs. 0 times       | 1.35 (0.66, 2.75) | 0.41 | 0.88 (0.38, 2.04) | 0.77 | 0.60 (0.28, 1.29) | 0.19 |
| 2+ vs. 0 times      | 1.01 (0.31, 3.32) | 0.99 | 1.25 (0.42, 3.69) | 0.69 | 1.15 (0.40, 3.31) | 0.79 |
| Separation Exercise |                   |      |                   |      |                   |      |
| 1 vs. 0 times       | 1.33 (0.63, 2.81) | 0.46 | 1.43 (0.65, 3.18) | 0.38 | 1.64 (0.79, 3.40) | 0.19 |
| 2+ vs. 0 times      | 1.94 (0.59, 6.36) | 0.27 | 1.17 (0.39, 3.48) | 0.78 | 0.86 (0.27, 2.73) | 0.80 |

\*Represented as the log of total visits to the becomanex.org website over the study period

\*\*P<0.01. Details on exact p-value in text.
